# Supplementary material
Source: MDPI journal article supplement (https://www.mdpi.com/2410-3896/7/2/40)
Supplement: s1 [file s1]

# Supplementary Materials: Evolution of the Chern Gap in Kagome Magnet $\text{HoMn}_6\text{Sn}_{6-x}\text{Ge}_x$

Christopher Sims<sup>1</sup> 

## 1. 3D Chern Analysis

The dotted lines indicated fractional charges of  $\mathbb{C}_{\mathcal{F}} = \frac{1}{4}, \frac{1}{3}, \frac{1}{2}, \frac{2}{3}, \frac{3}{4}$ , respectively.

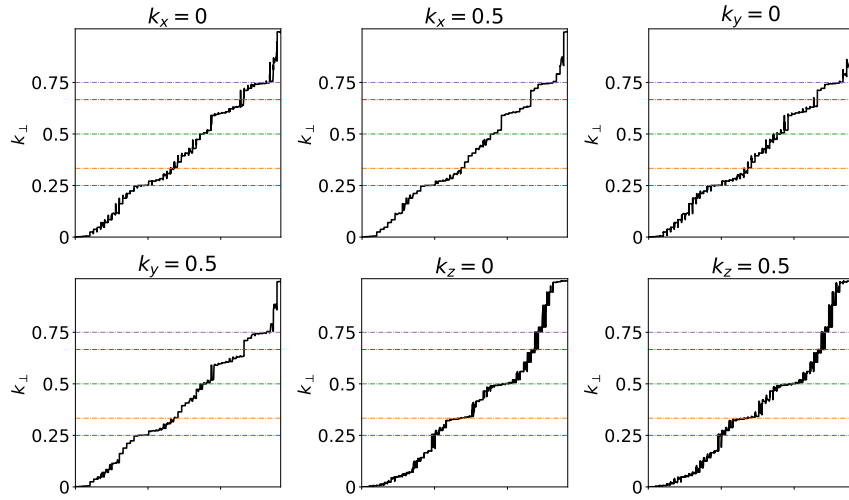

**Figure S1.** 3D Chern:  $\text{HoMn}_6\text{Sn}_6$

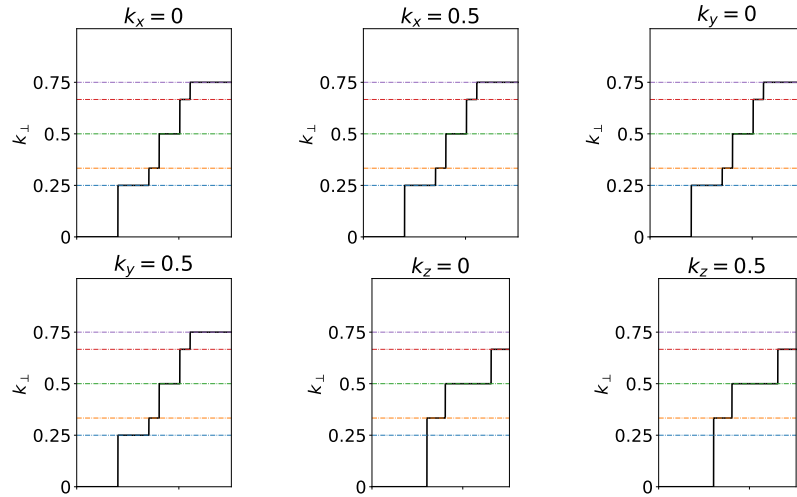

**Figure S2.** 3D Chern:  $\text{HoMn}_6\text{Sn}_4\text{Ge}_2$

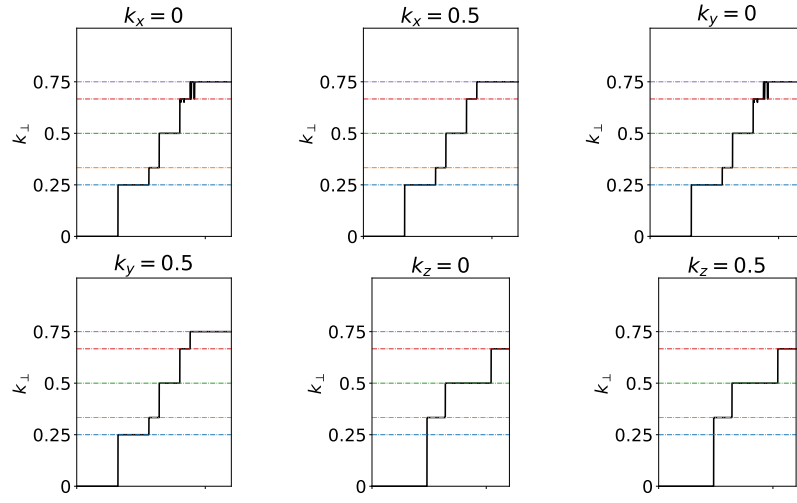

**Figure S3.** 3D Chern:  $\text{HoMn}_6\text{Sn}_2\text{Ge}_4$

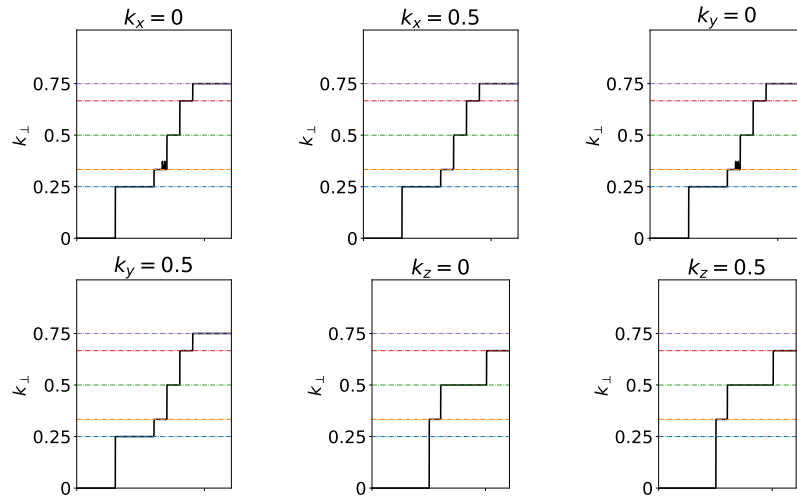

**Figure S4.** 3D Chern:  $\text{HoMn}_6\text{Ge}_6$
